# Supplementary material for: MnO2/onion-like carbon nanocomposites for pseudocapacitors
Source: Royal Society of Chemistry journal article supplement (doi:10.1039/c2jm33558a), 2012-01-01
Supplement: c2jm33558a.pdf [file c2jm33558a.pdf]

## **Supporting Information**

### **MnO<sub>2</sub>/onion-like carbon nanocomposite for pseudocapacitors**

**Ye Wang,<sup>a</sup> Siu Fung Yu,<sup>b</sup> Cheng Yue Sun,<sup>c</sup> Tie Jun Zhu,<sup>c</sup> Hui Ying Yang<sup>\*a</sup>**

<sup>a</sup> *Pillar of Engineering Product Development, Singapore University of Technology and Design, 20 Dover Drive, Singapore 138682; \*e-mail: [yanghuiying@sutd.edu.sg](mailto:yanghuiying@sutd.edu.sg)*

<sup>b</sup> *Department of Applied Physics, The Hong Kong Polytechnic University, Hung Hom, Kowloon, Hong Kong*

<sup>c</sup> *Department of Materials Science and Engineering, Zhejiang University, China 310027*

## Supporting Figures

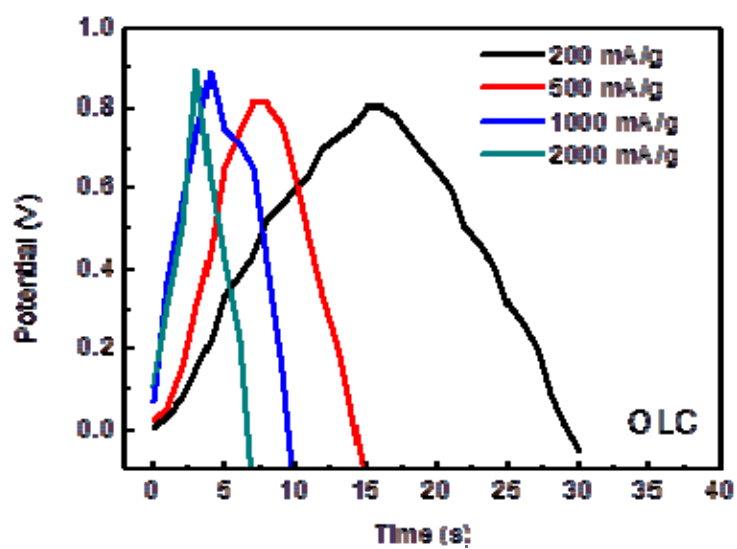

Fig. S1 Charge/discharge curves of pure onion-like carbon electrode at different current densities.
